# Supplementary material for: Silencing or inhibition of endoplasmic reticulum aminopeptidase 1 (ERAP1) suppresses free heavy chain expression and Th17 responses in ankylosing spondylitis
Source: PubMed Central journal article supplement (PMC4853590; doi:10.1136/annrheumdis-2014-206996), 2015-06-30
Supplement: annrheumdis-2014-206996-s3.pdf [file annrheumdis-2014-206996-s3.pdf]

**Supplementary Table 1 AS patient demographics**

|                             | Total<br>n=56  | rs30187 (T/C)  |                |                | rs27044 (G/C)  |                |                |
|-----------------------------|----------------|----------------|----------------|----------------|----------------|----------------|----------------|
|                             |                | TT<br>n=10     | CT<br>n=26     | CC<br>n=20     | GG<br>n=8      | CG<br>n=22     | CC<br>n=26     |
| <b>Age, mean ± SD years</b> | 43.0,<br>±12.7 | 49.1,<br>±15.3 | 42.1,<br>±13.7 | 41.8,<br>±10.3 | 52.1,<br>±14.1 | 40.2,<br>±13.7 | 43.1,<br>±11.1 |
| <b>Sex. male/female</b>     | 41/15          | 5/5            | 21/5           | 15/5           | 3/5            | 20/2           | 8/18           |
| <b>BASDAI, mean ± SD</b>    | 4.3, ±2.7      | 3.8, ±2.6      | 3.9, ±2.9      | 4.9, ±2.5      | 3.5, ±3.0      | 3.4, ±2.7      | 5.1, ±2.4      |
| <b>BASFI, mean ± SD</b>     | 3.7, ±2.8      | 4.1, ±3.5      | 3.6, ±2.6      | 3.9, ±2.9      | 4.1, ±3.5      | 3.0, ±2.4      | 4.3, ±2.9      |
| <b>BASMI, mean ± SD</b>     | 3.8, ±2.4      | 2.9, ±2.7      | 4.0, ±2.7      | 3.8, ±2.3      | 2.9, ±2.7      | 3.6, ±2.6      | 4.1, ±2.4      |

AS = Ankylosing Spondylitis; BASDAI = Bath Ankylosing Spondylitis Disease Activity Index; BASFI = Bath Ankylosing Spondylitis Functional Index; BASMI = Bath Ankylosing Spondylitis Metrology Index; none of the patients have been treated with TNF- $\alpha$  blockade (In some cases, score for BASDAI (n=4), BASFI (n=9) and BASMI (n=17) was not available).
